# Supplementary material for: The deactivation of a ZnO doped ZrO2–SiO2catalyst in the conversion of ethanol/acetaldehyde to 1,3-butadiene
Source: Royal Society of Chemistry journal article supplement (doi:10.1039/c8ra06757k), 2018-01-01
Supplement: c8ra06757k1.pdf [file c8ra06757k1.pdf]

## Supporting Information

**Table. S1** Catalytic evaluation of regenerated catalysts at 310 °C, WHSV of 1.8 h<sup>-1</sup> and ethanol/acetaldehyde mole ratio of 3.5 for 10 h.

| Catalyst         | Con. (%) | Selectivity (C mol%) |     |     |      |     |     |     |     |
|------------------|----------|----------------------|-----|-----|------|-----|-----|-----|-----|
|                  |          | EL                   | PL  | BL  | BD   | DE  | EA  | BU  | C6+ |
| Fresh            | 33.5     | 4.9                  | 1.4 | 0.4 | 84.2 | 3.3 | 1.5 | 0.5 | 3.8 |
| 1st regeneration | 32.6     | 3.8                  | 1.9 | 0.5 | 85.0 | 3.8 | 0.9 | 1.1 | 3.3 |
| 2nd regeneration | 33.2     | 3.0                  | 1.5 | 0.4 | 85.8 | 4.5 | 1.0 | 1.2 | 2.6 |

**Table. S2** The influence of different addition amount of water on the catalytic activity at 310 °C, WHSV of 1.8 h<sup>-1</sup> and ethanol/acetaldehyde mole ratio of 3.5 for 10 h.

| H <sub>2</sub> O content (vol%) | Con. /% | Selectivity (C mol%) |     |     |      |     |     |     |     |
|---------------------------------|---------|----------------------|-----|-----|------|-----|-----|-----|-----|
|                                 |         | EL                   | PL  | BL  | BD   | DE  | EA  | BU  | C6+ |
| 0                               | 33.5    | 4.9                  | 1.4 | 0.5 | 84.2 | 3.3 | 1.5 | 0.5 | 3.8 |
| 5                               | 38.1    | 4.4                  | 1.6 | 1.3 | 85.0 | 2.7 | 1.7 | 0.4 | 3.1 |
| 10                              | 34.2    | 3.1                  | 2.0 | 1.5 | 86.6 | 1.9 | 1.3 | 0.4 | 3.2 |
| 15                              | 31.8    | 2.9                  | 3.0 | 1.6 | 85.3 | 1.5 | 1.5 | 0.5 | 3.9 |

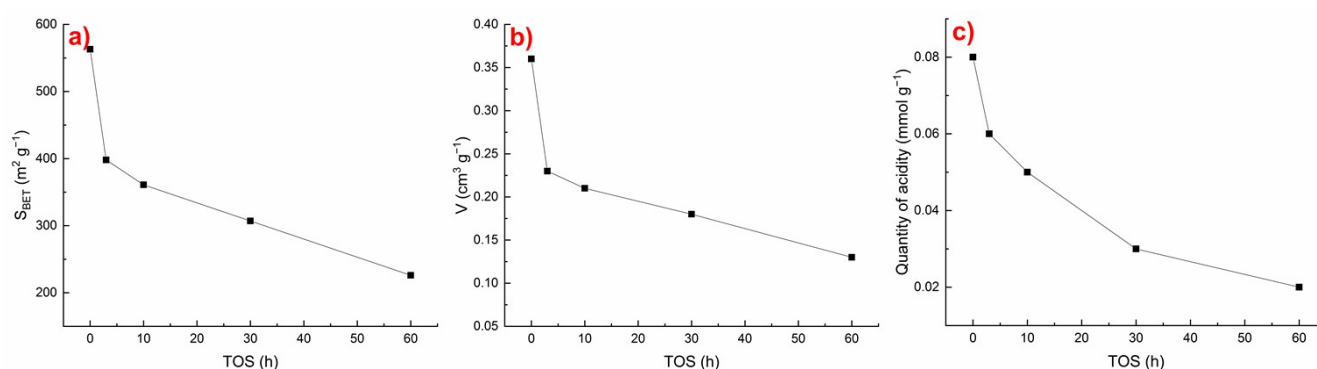

**Fig. S1** Change of (a) specific surface area, (b) pore volume and (c) the total amount of acid sites with increasing of TOS.

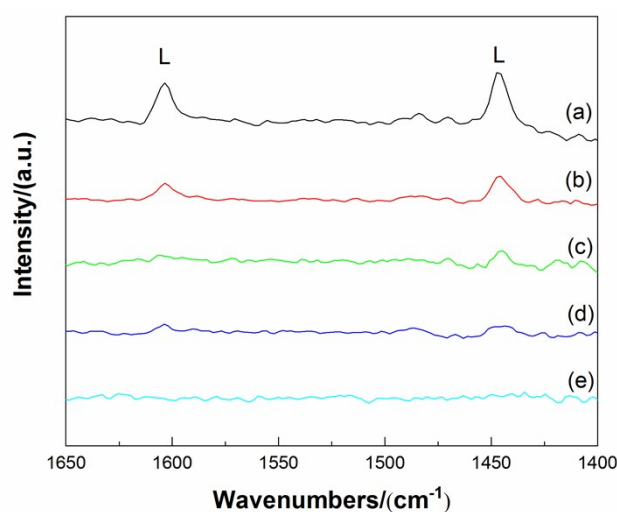

**Fig.S2** Py-IR spectra of catalysts with different TOS. (a) 0 h; (b) 3 h; (c) 10 h; (d) 30 h; (e) 60 h.

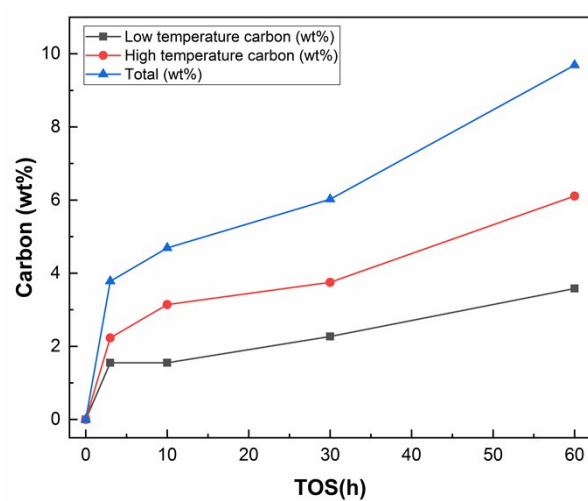

**Fig. S3** Accumulation rate of two type carbon deposit

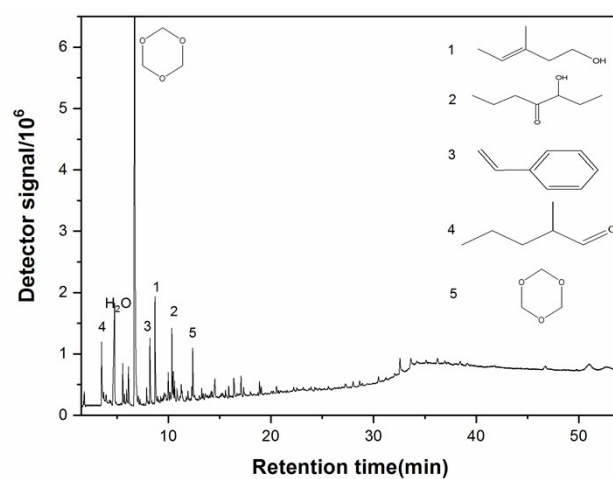

**Fig. S4** GC-MS spectroscopy of extraction raffinate in the CH<sub>2</sub>Cl<sub>2</sub> extraction of the used catalysts

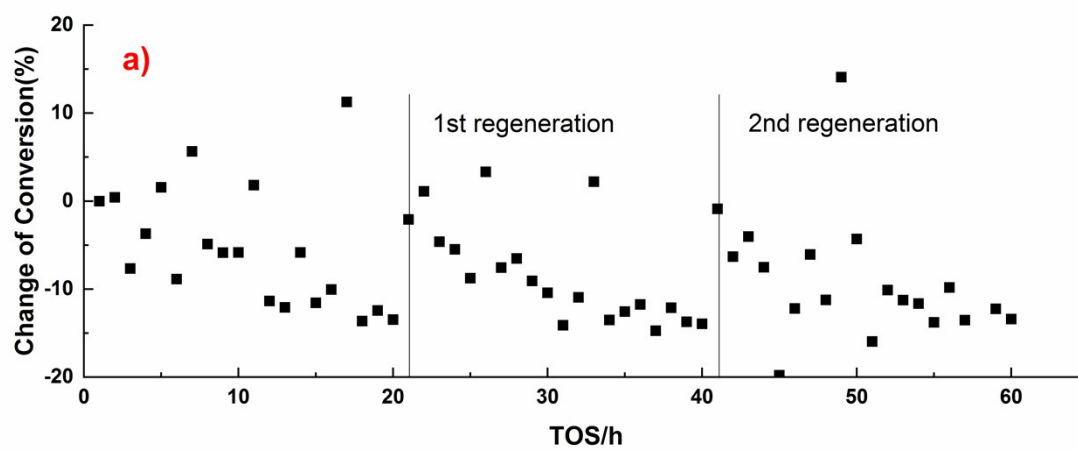

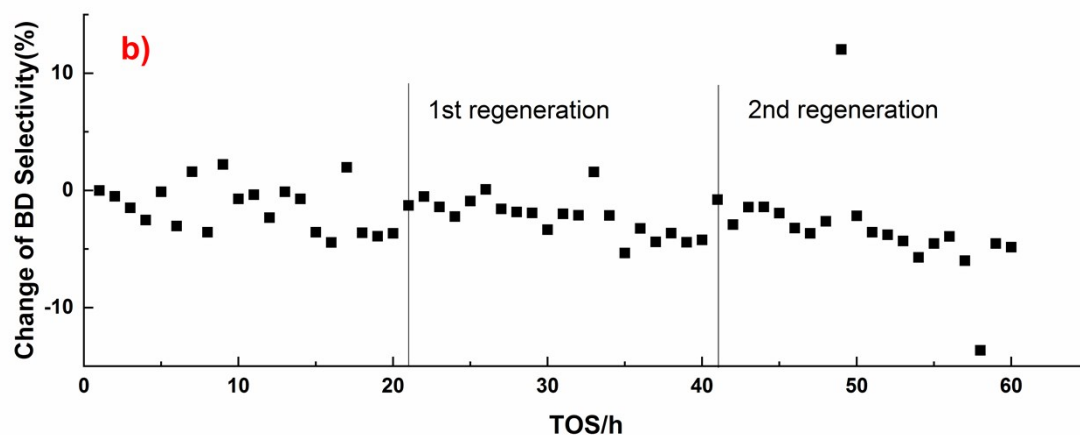

**Fig. S5** Changes of Conversion and BD Selectivity. a) Conversion; b) BD Selectivity

The catalyst was regenerated insitu in the reactor and the run-time for tests with catalyst after first and second regeneration was recorded. The regeneration cycles were conducted under flowing synthetic air at 650 °C for 6 h. Due to the change of conversion and BD selectivity was not obvious, we processed the data and change of conversion or selectivity was calculated as follows:

$$\text{Change of Conversion} = \frac{C_n - C_1}{C_1} \times 100\% ;$$

$$\text{Change of Selectivity} = \frac{S_n - S_1}{S_1} \times 100\%$$

C1, S1 means conversion or BD selectivity of 1 h of TOS;

Cn, Sn means conversion or BD selectivity of 1 h of TOS (n≤60).
